# Supplementary material for: Understanding User Behavior Through the Use of Unsupervised Anomaly Detection: Proof of Concept Using Internet of Things Smart Home Thermostat Data for Improving Public Health Surveillance
Source: PubMed Central journal article supplement (PMC7695536; doi:10.2196/21209), 2020-11-13
Supplement: mhealth_v8i11e21209_app1.pdf [file mhealth_v8i11e21209_app1.pdf]

Table S1. The average time spent home, sleep time, and wake-up time for 30 households is demonstrated below. The number of regular activity patterns are different for each household. For some models, the motion activity has not been observed after leaving the house. Therefore, the time spent sleeping could not be recognized.

|      | Minutes spending home ( $\mu \pm \sigma$ ) | Wake up time( $\mu$ ) | Sleeping time( $\mu$ ) |
|------|--------------------------------------------|-----------------------|------------------------|
| HH0  | 465 $\pm$ 15                               | 05 : 00               | 21 : 00                |
| HH1  | 700 $\pm$ 14                               | 06 : 30               | 22 : 30                |
| HH2  | 727 $\pm$ 25                               | 06 : 30               | 21 : 00                |
| HH3  | 930                                        | 06 : 00               | 21 : 30                |
| HH4  | 30                                         | 06 : 30               | --                     |
| HH5  | 267 $\pm$ 9                                | 05 : 30               | 22 : 00                |
| HH6  | 476 $\pm$ 9                                | 07 : 00               | 21 : 15                |
| HH7  | 436 $\pm$ 15                               | 08 : 30               | 01 : 00                |
| HH8  | 990                                        | 06 : 00               | 22 : 30                |
| HH9  | 710 $\pm$ 25                               | 06 : 00               | 21 : 30                |
| HH10 | 995 $\pm$ 11                               | 06 : 30               | --                     |
| HH11 | 1080                                       | 06 : 00               | 00 : 00                |
| HH12 | 442 $\pm$ 13                               | 03 : 30               | 21 : 30                |
| HH13 | 333 $\pm$ 10                               | 05 : 30               | 21 : 00                |
| HH14 | 591 $\pm$ 19                               | 06 : 30               | 22 : 00                |
| HH15 | 707 $\pm$ 15                               | 07 : 00               | --                     |
| HH16 | 480                                        | 06 : 00               | 00 : 30                |
| HH17 | 797 $\pm$ 22                               | 07 : 30               | 01 : 30                |
| HH18 | 450                                        | 06 : 00               | --                     |

|      |        |    |         |         |
|------|--------|----|---------|---------|
| HH19 | 987±10 |    | 06 : 30 | 23 : 00 |
| HH20 | 566±10 |    | 05 : 00 | 00 : 00 |
| HH21 | 628±19 |    | 08 : 00 | 22 : 00 |
| HH22 | 90±2   | -- |         | --      |
| HH23 | 650±14 |    | 06 : 30 | 00 : 00 |
| HH24 | 325±19 |    | 06 : 00 | 01 : 00 |
| HH25 | 945±15 |    | 06 : 00 | 22 : 00 |
| HH26 | 145±22 |    | 06 : 00 | --      |
| HH27 | 811±6  |    | 06 : 00 | 22 : 30 |
| HH28 | 730±18 |    | 05 : 30 | 00 : 30 |
| HH29 | 900±4  |    | 06 : 00 | 21 : 30 |
