# Supplementary material for: Understanding User Behavior Through the Use of Unsupervised Anomaly Detection: Proof of Concept Using Internet of Things Smart Home Thermostat Data for Improving Public Health Surveillance
Source: PubMed Central journal article supplement (PMC7695536; doi:10.2196/21209), 2020-11-13
Supplement: mhealth_v8i11e21209_app2.pdf [file mhealth_v8i11e21209_app2.pdf]

Table S2. Average minutes spent at home for different days of the week, based on the regular activity model (minutes)

|             | <b>Mon</b> | <b>Tue</b> | <b>Wed</b> | <b>Thu</b> | <b>Fri</b> | <b>Sat</b> | <b>Sun</b> |
|-------------|------------|------------|------------|------------|------------|------------|------------|
| <b>HH0</b>  | 450 ± 8    | 432 ± 16   | 465 ± 15   | 448 ± 22   | 310 ± 29   | 845 ± 29   | 775 ± 22   |
| <b>HH1</b>  | 933 ± 19   | 403 ± 222  | 875 ± 96   | 851 ± 67   | 826 ± 47   | 231 ± 71   | 430 ± 38   |
| <b>HH2</b>  | 564 ± 37   | 260 ± 40   | 514 ± 33   | 446 ± 27   | 933 ± 12   | 932 ± 13   | 735 ± 42   |
| <b>HH3</b>  | 903 ± 9    | 947 ± 18   | 857 ± 17   | 880 ± 17   | 920 ± 19   | 920 ± 14   | 902 ± 12   |
| <b>HH4</b>  | 0          | 42 ± 15    | 33 ± 9     | 51 ± 18    | 92 ± 62    | 422 ± 40   | 466 ± 72   |
| <b>HH5</b>  | 294 ± 20   | 305 ± 21   | 262 ± 13   | 264 ± 12   | 167 ± 24   | 188 ± 34   | 517 ± 195  |
| <b>HH6</b>  | 470 ± 14   | 574 ± 26   | 405 ± 31   | 588 ± 24   | 441 ± 20   | 595 ± 55   | 660 ± 59   |
| <b>HH7</b>  | 483 ± 41   | 480 ± 25   | 410 ± 16   | 480 ± 20   | 465 ± 27   | 728 ± 50   | 1079 ± 8   |
| <b>HH8</b>  | 992 ± 7    | 981 ± 24   | 843 ± 41   | 1018 ± 7   | 707 ± 16   | 925 ± 39   | 862 ± 16   |
| <b>HH9</b>  | 911 ± 21   | 540 ± 80   | 722 ± 26   | 523.8 ± 70 | 598.8 ± 93 | 188 ± 19.5 | 1037 ± 15  |
| <b>HH10</b> | 1020 ± 11  | 625 ± 24   | 778 ± 35   | 943 ± 72   | 1019 ± 6   | 954 ± 22   | 938 ± 19   |
| <b>HH11</b> | 1050       | 875 ± 25   | 996 ± 57   | 1050       | 1046 ± 10  | 989 ± 4    | 984 ± 12   |
| <b>HH12</b> | 477 ± 9    | 407 ± 15   | 428 ± 14   | 448 ± 8    | 448 ± 11   | 878 ± 56   | 909 ± 13   |
| <b>HH13</b> | 339 ± 13   | 299 ± 6    | 613 ± 70   | 303 ± 10   | 384 ± 12   | 775 ± 16   | 891 ± 26   |
| <b>HH14</b> | 423 ± 43   | 438 ± 21   | 633 ± 34   | 535 ± 15   | 522 ± 18   | 905 ± 20   | 909 ± 15   |
| <b>HH15</b> | 833 ± 18   | 775 ± 53   | 943 ± 20   | 806 ± 23   | 657 ± 29   | 29 ± 29    | 536 ± 68   |
| <b>HH16</b> | 531 ± 24   | 548 ± 13   | 495 ± 15   | 517 ± 20   | 478 ± 7    | 665 ± 27   | 850 ± 17   |
| <b>HH17</b> | 632 ± 38   | 283 ± 97   | 419 ± 25   | 557 ± 26   | 1063 ± 17  | 964 ± 30   | 1011 ± 23  |
| <b>HH18</b> | 805 ± 21   | 804 ± 12   | 266 ± 42   | 358 ± 48   | 547 ± 64   | 235 ± 15   | 348 ± 37   |
| <b>HH19</b> | 593 ± 15   | 561 ± 15   | 528 ± 21   | 782 ± 11   | 1021 ± 6   | 987 ± 8    | 959 ± 4    |

|             |          |          |          |          |           |           |          |
|-------------|----------|----------|----------|----------|-----------|-----------|----------|
| <b>HH20</b> | 563 ± 19 | 545 ± 11 | 570 ± 17 | 580 ± 15 | 483 ± 16  | 982 ± 24  | 877 ± 13 |
| <b>HH21</b> | 507 ± 42 | 435 ± 18 | 370 ± 14 | 493 ± 40 | 808 ± 30  | 965 ± 12  | 835 ± 22 |
| <b>HH22</b> | 179 ± 4  | 194 ± 20 | 191 ± 19 | 122 ± 17 | 0         | 0         | 223 ± 26 |
| <b>HH23</b> | 653 ± 14 | 593 ± 14 | 634 ± 24 | 598 ± 10 | 621 ± 15  | 1015 ± 11 | 852 ± 23 |
| <b>HH24</b> | 127 ± 13 | 239 ± 20 | 429 ± 39 | 210 ± 26 | 336 ± 21  | 385 ± 28  | 879 ± 17 |
| <b>HH25</b> | 905 ± 15 | 906 ± 12 | 885 ± 15 | 923 ± 15 | 903 ± 10  | 890 ± 14  | 866 ± 21 |
| <b>HH26</b> | 229 ± 24 | 256 ± 34 | 101 ± 20 | 62 ± 7   | 158 ± 46  | 394 ± 30  | 418 ± 59 |
| <b>HH27</b> | 561 ± 20 | 605 ± 34 | 619 ± 21 | 543 ± 17 | 1045 ± 11 | 945 ± 16  | 946 ± 15 |
| <b>HH28</b> | 661 ± 17 | 524 ± 18 | 580 ± 17 | 590 ± 21 | 534 ± 16  | 988 ± 20  | 999 ± 21 |
| <b>HH29</b> | 900      | 927 ± 16 | 911 ± 19 | 908 ± 16 | 928 ± 16  | 834 ± 11  | 890 ± 22 |
