# Supplementary material for: Understanding User Behavior Through the Use of Unsupervised Anomaly Detection: Proof of Concept Using Internet of Things Smart Home Thermostat Data for Improving Public Health Surveillance
Source: PubMed Central journal article supplement (PMC7695536; doi:10.2196/21209), 2020-11-13
Supplement: mhealth_v8i11e21209_app3.pdf [file mhealth_v8i11e21209_app3.pdf]

Table S3. Comparing the average spent home during the week versus weekend for 30 households.

|             | <b>Weekday (<math>\mu</math>)<sub>minutes</sub></b> | <b>Weekend (<math>\mu</math>)<sub>minutes</sub></b> |
|-------------|-----------------------------------------------------|-----------------------------------------------------|
| <b>HH0</b>  | 421                                                 | 810                                                 |
| <b>HH1</b>  | 778                                                 | 330                                                 |
| <b>HH2</b>  | 543                                                 | 833                                                 |
| <b>HH3</b>  | 901                                                 | 911                                                 |
| <b>HH4</b>  | 44                                                  | 444                                                 |
| <b>HH5</b>  | 258                                                 | 352                                                 |
| <b>HH6</b>  | 496                                                 | 627                                                 |
| <b>HH7</b>  | 464                                                 | 903                                                 |
| <b>HH8</b>  | 908                                                 | 893                                                 |
| <b>HH9</b>  | 659                                                 | 612                                                 |
| <b>HH10</b> | 876                                                 | 945                                                 |
| <b>HH11</b> | 1003                                                | 986                                                 |
| <b>HH12</b> | 442                                                 | 893                                                 |
| <b>HH13</b> | 387                                                 | 832                                                 |
| <b>HH14</b> | 510                                                 | 906                                                 |
| <b>HH15</b> | 803                                                 | 282                                                 |
| <b>HH16</b> | 513                                                 | 757                                                 |
| <b>HH17</b> | 590                                                 | 987                                                 |
| <b>HH18</b> | 556                                                 | 291                                                 |
| <b>HH19</b> | 696                                                 | 973                                                 |
| <b>HH20</b> | 548                                                 | 929                                                 |
| <b>HH21</b> | 522                                                 | 899                                                 |
